# Supplementary material for: Photoinduced azobenzene-modified DNA dehybridization: insights into local and cooperativity effects from a molecular dynamics study
Source: Royal Society of Chemistry journal article supplement (doi:10.1039/d1cp04032d), 2021-01-01
Supplement: d1cp04032d1.pdf [file d1cp04032d1.pdf]

Supplementary Material for

Photoinduced Azobenzene-modified DNA

Dehybridization: Insights into Local and

Cooperativity Effects from a Molecular Dynamics

Study

Nuno Barbosa,<sup>a</sup> Luca Sagresti<sup>a,b</sup> and Giuseppe Brancato<sup>a,b\*</sup>

<sup>a</sup> Scuola Normale Superiore, piazza dei Cavalieri 7, I-56126 Pisa, Italy and CSGI.

<sup>b</sup> Istituto Nazionale di Fisica Nucleare, Largo Pontecorvo 3, I-56100 Pisa, Italy

Corresponding authors:

E-mail: [giuseppe.brancato@sns.it](mailto:giuseppe.brancato@sns.it)

# Content

- 1) **Figure S1** Inclination step parameter as issuing from MD simulations of the **1A**, **2A**, **3A**, **4A** and **7A** all-*trans* azobenzene modified-DNA systems.
- 2) **Figure S2** Number of hydrogen bonds between each base pair of the **1A**, **1B**, and **1C** *trans* and *cis* azobenzene modified-DNA systems.
- 3) **Figure S3** Connection parameter between each base pair of the **1A**, **1B**, and **1C** *trans* and *cis* azobenzene modified-DNA systems.
- 4) **Figure S4** Pulling force as a function of displacement from SMD simulations of the **2A**, **3A** and **4A** all-*trans* and all-*cis* azobenzene modified-DNA systems.
- 5) **Figure S5** Rise parameter as issuing from MD simulations of the **3A**, **3B**, **4A**, and **4B** all-*trans* azobenzene modified-DNA systems.
- 6) **Figure S6** Inclination parameter as issuing from MD simulations of the **3A**, **3B**, **4A**, and **4B** all-*trans* azobenzene modified-DNA systems.
- 7) **Figure S7** Pulling force as a function of displacement from SMD simulations of the **3A** and **3B** all-*trans* and all-*cis* azobenzene modified-DNA systems.

**Figure S1**

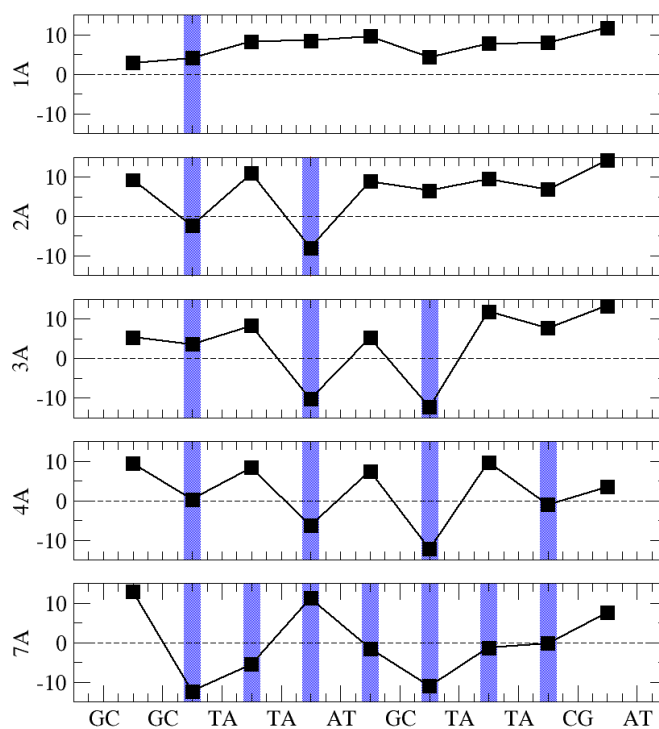

**Figure S1** Inclination step parameter (values in degree) as issuing from MD simulations of the 1A, 2A, 3A, 4A and 7A all-*trans* azobenzene modified-DNA systems. Shaded areas indicate the azobenzene moiety insertion points along the DNA duplex.

**Figure S2**

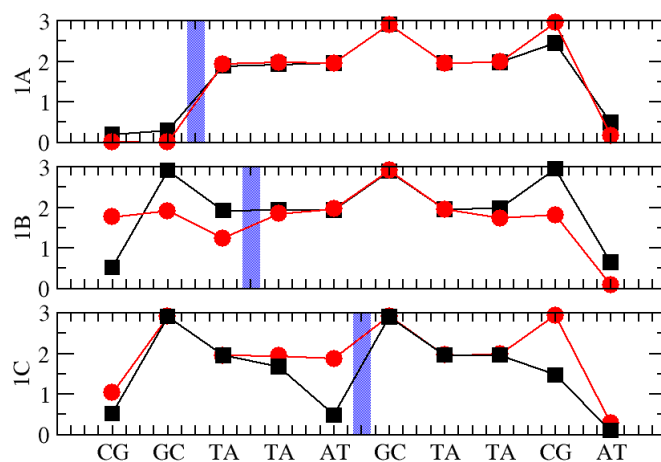

**Figure S2** Number of hydrogen bonds between each base pair of the **1A**, **1B**, and **1C** *trans* (black) and *cis* (red) azobenzene modified-DNA systems. Shaded areas indicate the azobenzene insertion points along the DNA duplex.

**Figure S3**

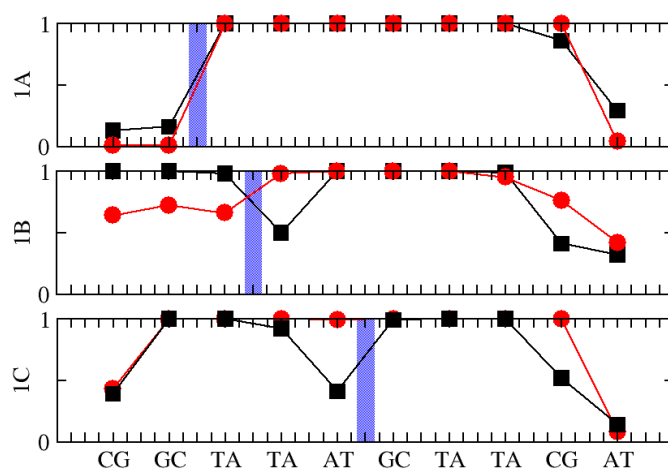

**Figure S3** Connection parameter between each base pair of the **1A**, **1B**, and **1C** *trans* (black) and *cis* (red) azobenzene modified-DNA systems. Shaded areas indicate the azobenzene insertion points along the DNA duplex.

**Figure S4**

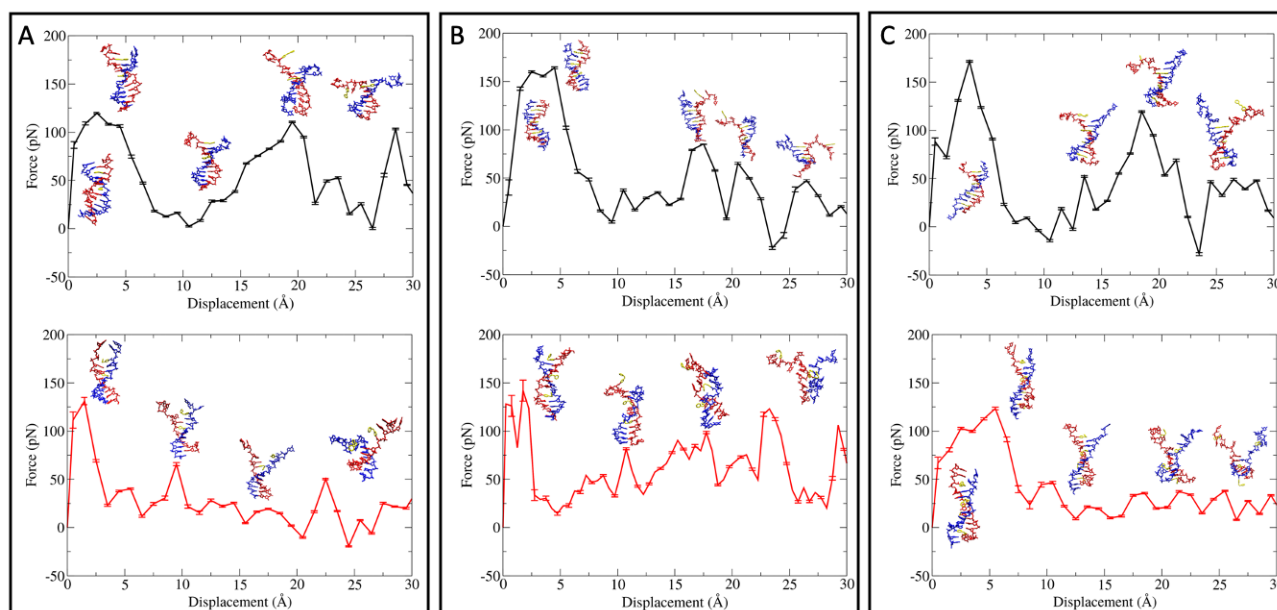

**Figure S4** Pulling force as a function of displacement from SMD simulations of the (A) **2A**, (B) **3A** and (C) **4A** all-*trans* (top, black) and all-*cis* (bottom, red) azobenzene modified-DNA systems. Insets, representative molecular configurations from corresponding MD trajectories: the two DNA strands are in blue and red, azobenzene unit in yellow.

**Figure S5**

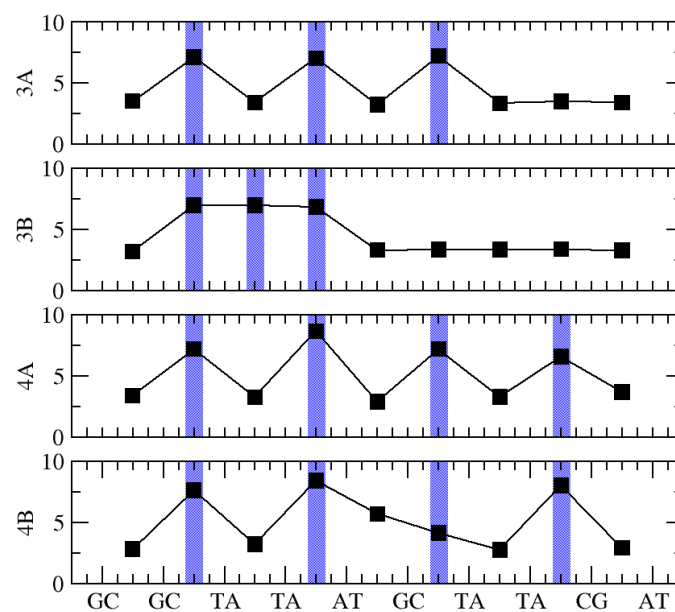

**Figure S5** Rise parameter (values in Å) as issuing from MD simulations of the **3A**, **3B**, **4A**, and **4B** all-*trans* azobenzene modified-DNA systems. Shaded areas indicate the azobenzene insertion points along the DNA duplex.

**Figure S6**

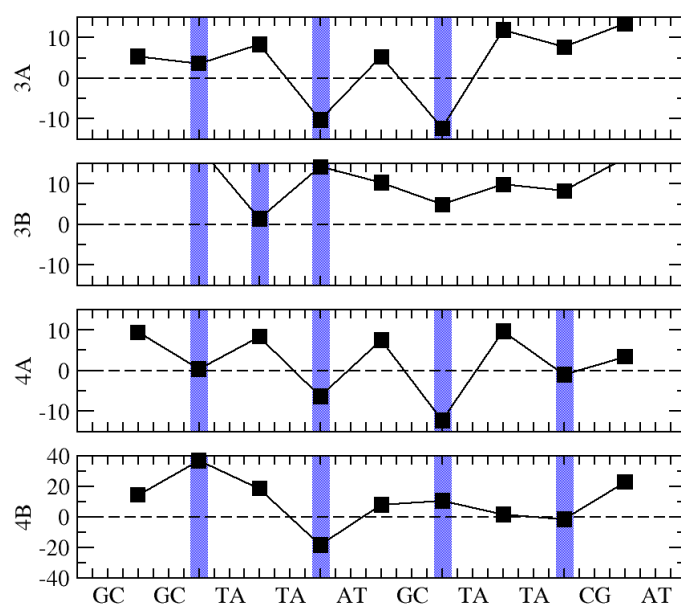

**Figure S6** Inclination parameter (values in degree) as issuing from MD simulations of the **3A**, **3B**, **4A**, and **4B** all-*trans* azobenzene modified-DNA systems. Shaded areas indicate the azobenzene insertion points along the DNA duplex.

**Figure S7**

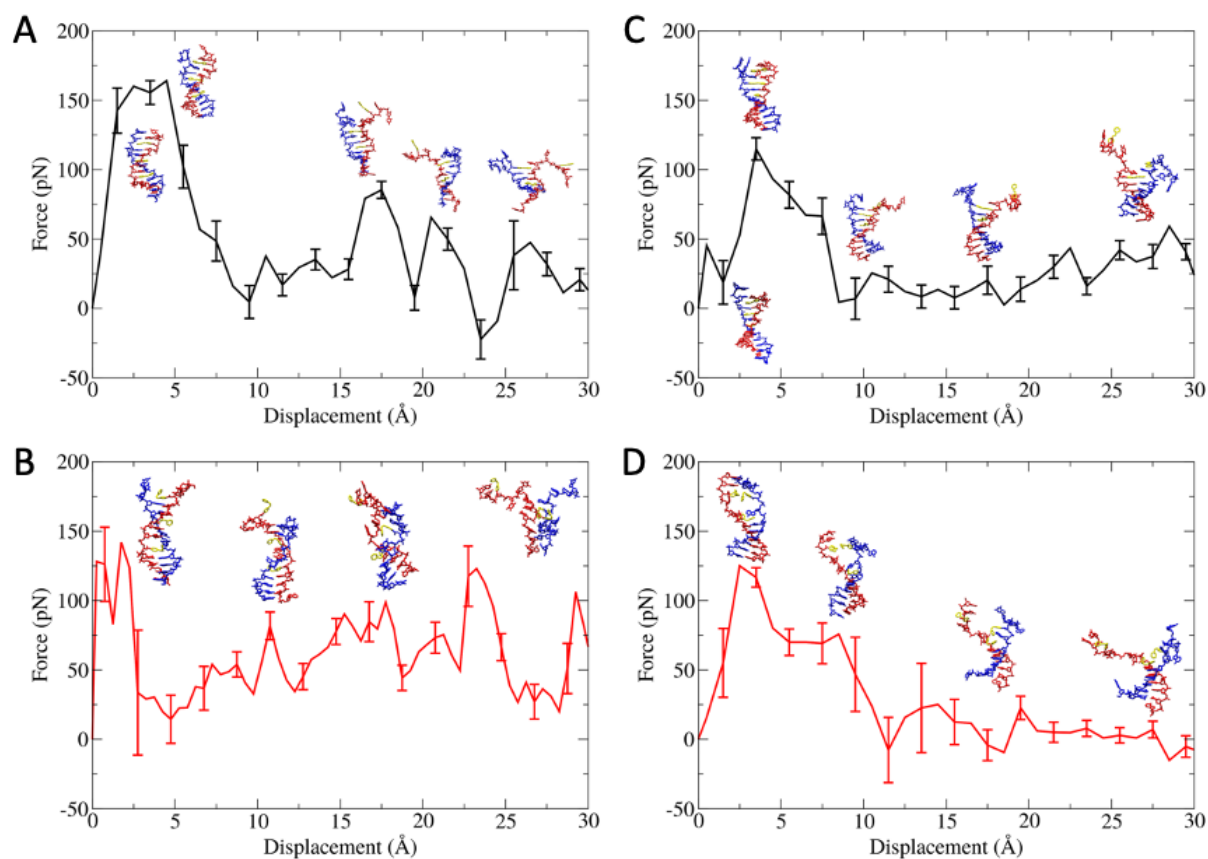

**Figure S7** Pulling force as a function of displacement from SMD simulations of the (A, B) **3A** and (C, D) **3B** all-*trans* (top, black) and all-*cis* (bottom, red) azobenzene modified-DNA systems. Insets, representative molecular configurations from corresponding MD trajectories: the two DNA strands are in blue and red, azobenzene unit in yellow.
